# Supplementary material
Source: PubMed Central journal article supplement (PMC9126272)
Supplement: pxab102_suppl_supplementary_material.pdf [file pxab102_suppl_supplementary_material.pdf]

## Appendix: Supplementary Materials

### Supplementary Table S1

#### *Parent and Child Anxiety about COVID-19*

| Items                                                                                | Responses     |               |                 |               |                     | Cronbach's alpha |
|--------------------------------------------------------------------------------------|---------------|---------------|-----------------|---------------|---------------------|------------------|
|                                                                                      | 1, Not at all | 2, Slightly   | 3, Moderately   | 4, Very       | 5, Extremely        |                  |
| <i>Parent/Caregiver Anxiety about COVID-19</i>                                       |               |               |                 |               |                     | .72              |
| How worried have you (parent/caregiver) been about being infected?                   | 8.4%<br>(15)  | 28.5%<br>(51) | 46.4%<br>(83)   | 14.5%<br>(26) | 2.2%<br>(4)         |                  |
| How worried have you (parent/caregiver) been about friends or family being infected? | 5.0%<br>(9)   | 22.3%<br>(40) | 38%<br>(68)     | 26.8%<br>(48) | 7.8%<br>(14)        |                  |
|                                                                                      | 1, Never      | 2, Rarely     | 3, Occasionally | 4, Often      | 5, Most of the time |                  |
| How much are you (parent/caregiver) reading, watching, or talking about COVID-19?    | 0.6%<br>(1)   | 0%<br>(0)     | 24.6%<br>(44)   | 57%<br>(102)  | 17.9%<br>(32)       |                  |
| <i>Child Anxiety about COVID-19</i>                                                  |               |               |                 |               |                     | .79              |
| How worried has your child been about being infected?                                | 19.9%<br>(35) | 40.3%<br>(71) | 30.7%<br>(54)   | 7.4%<br>(13)  | 1.7%<br>(3)         |                  |
| How worried has your child been about friends or family being infected?              | 13.8%<br>(24) | 36.8%<br>(64) | 31%<br>(54)     | 17.2%<br>(30) | 1.1%<br>(2)         |                  |
|                                                                                      | 1, Never      | 2, Rarely     | 3, Occasionally | 4, Often      | 5, Most of the time |                  |
| How much is your child asking about COVID-19?                                        | 2.8%<br>(5)   | 19.9%<br>(35) | 52.3%<br>(92)   | 20.5%<br>(36) | 4.5%<br>(8)         |                  |

**Supplementary Table S2a**

*Prevalence of Mental Health Symptoms by Grade Group*

|                                    | <b>Grade 4 and Below<br/>(n=57)</b> |                                  |                                      | <b>Grade 5 and Above<br/>(n=121)</b> |                                  |                                      |
|------------------------------------|-------------------------------------|----------------------------------|--------------------------------------|--------------------------------------|----------------------------------|--------------------------------------|
|                                    | Happy/Cheerful<br>% (n)             | Neutral<br>% (n)                 | Sad/Depressed<br>% (n)               | Happy/Cheerful<br>% (n)              | Neutral<br>% (n)                 | Sad/Depressed<br>% (n)               |
| Mood/<br>Depression                | 70.2%<br>(40)                       | 21.1%<br>(12)                    | 8.8%<br>(5)                          | 33%<br>(40)                          | 45.5%<br>(55)                    | 21.5%<br>(26)                        |
|                                    | Relaxed/Calm<br>% (n)               | Neutral<br>% (n)                 | Nervous/Anxious<br>% (n)             | Relaxed/Calm<br>% (n)                | Neutral<br>% (n)                 | Nervous/Anxious<br>% (n)             |
| Anxiety/<br>General<br>Nervousness | 40.4%<br>(23)                       | 38.6%<br>(22)                    | 21.1%<br>(12)                        | 28.1%<br>(34)                        | 45.5%<br>(55)                    | 26.5%<br>(32)                        |
|                                    | Not/Slightly<br>Irritable<br>% (n)  | Moderately<br>Irritable<br>% (n) | Very/Extremely<br>Irritable<br>% (n) | Not/Slightly<br>Irritable<br>% (n)   | Moderately<br>Irritable<br>% (n) | Very/Extremely<br>Irritable<br>% (n) |
| Irritability                       | 78.9%<br>(45)                       | 19.3%<br>(11)                    | 1.8%<br>(1)                          | 76.9%<br>(93)                        | 15.7% (19)                       | (9)                                  |
|                                    | Focused/<br>Attentive<br>% (n)      | Neutral<br>% (n)                 | Unfocused/<br>Distracted<br>% (n)    | Focused/<br>Attentive<br>% (n)       | Neutral<br>% (n)                 | Unfocused/Distracted<br>% (n)        |
| Concentration                      | 38.6%<br>(22)                       | 42.1%<br>(24)                    | 19.3%<br>(11)                        | 33.1%<br>(40)                        | 37.2%<br>(45)                    | 29.7%<br>(36)                        |
|                                    | Not/Slightly<br>Fidgety<br>% (n)    | Moderately Fidgety<br>% (n)      | Very/Extremely<br>Fidgety<br>% (n)   | Not/Slightly<br>Fidgety<br>% (n)     | Moderately<br>Fidgety<br>% (n)   | Very/Extremely<br>Fidgety<br>% (n)   |
| Hyperactivity/<br>Fidgeting        | 71.9%<br>(41)                       | 21.1%<br>(12)                    | 7.0%<br>(4)                          | 70.8%<br>(85)                        | 22.5%<br>(27)                    | 6.7%<br>(8)                          |

**Note.** N = 178 because two participants did not provide responses for these mental health items.

**Supplementary Table S2b*****Prevalence of Mental Health Change by Grade Group***

|                             | <b>Grade 4 and Below (n=59)</b> |                 |                | <b>Grade 5 and Above (n=121)</b> |                 |                |
|-----------------------------|---------------------------------|-----------------|----------------|----------------------------------|-----------------|----------------|
|                             | Deteriorated % (n)              | Unchanged % (n) | Improved % (n) | Deteriorated % (n)               | Unchanged % (n) | Improved % (n) |
| Mood/Depression             | 24.6%<br>(14)                   | 66.7%<br>(38)   | 8.8%<br>(5)    | 38.8%<br>(47)                    | 47.1%<br>(57)   | 14%<br>(17)    |
| Anxiety/General Nervousness | 24.6%<br>(14)                   | 73.7%<br>(42)   | 1.8%<br>(1)    | 28.9%<br>(35)                    | 62.8%<br>(76)   | 8.3%<br>(10)   |
| Irritability                | 33.3%<br>(19)                   | 64.9%<br>(37)   | 1.8%<br>(1)    | 40.8%<br>(49)                    | 57.5%<br>(69)   | 1.7%<br>(2)    |
| Concentration               | 22.8%<br>(13)                   | 71.9%<br>(41)   | 5.3%<br>(3)    | 35.5%<br>(43)                    | 62%<br>(75)     | 2.5%<br>(3)    |
| Fidgeting                   | 14%<br>(8)                      | 84.2%<br>(48)   | 1.8%<br>(1)    | 16.5%<br>(20)                    | 81.8%<br>(99)   | 1.7%<br>(2)    |

**Supplementary Table S3**

*Attitudes Towards School Reopening and Public Health Measures*

| <b>Children in Grades 4 and Lower</b>                                          |                                                                                   |                                                                                   |                                                                                   |                                                                                     |                                                                                     |
|--------------------------------------------------------------------------------|-----------------------------------------------------------------------------------|-----------------------------------------------------------------------------------|-----------------------------------------------------------------------------------|-------------------------------------------------------------------------------------|-------------------------------------------------------------------------------------|
| <b>Item</b>                                                                    | <b>Responses</b>                                                                  |                                                                                   |                                                                                   |                                                                                     |                                                                                     |
|                                                                                |  |  |  |  |  |
|                                                                                | 1, Not at all                                                                     |                                                                                   |                                                                                   |                                                                                     | 5, A lot                                                                            |
| I am looking forward to school                                                 | 5.2%<br>(3)                                                                       | 3.4%<br>(2)                                                                       | 20.7%<br>(12)                                                                     | 22.4%<br>(13)                                                                       | 48.3%<br>(28)                                                                       |
|                                                                                | 1, Very hard                                                                      |                                                                                   |                                                                                   |                                                                                     | 5, No problem                                                                       |
| Wearing a mask all day was/would be:                                           | 25.9%<br>(15)                                                                     | 10.3%<br>(6)                                                                      | 20.7%<br>(12)                                                                     | 17.2%<br>(10)                                                                       | 25.9%<br>(15)                                                                       |
|                                                                                | 1, Not at all                                                                     |                                                                                   |                                                                                   |                                                                                     | 5, No problem                                                                       |
| I could/would be able to talk and play with my classmates while wearing a mask | 5.2%<br>(3)                                                                       | 6.9%<br>(4)                                                                       | 19%<br>(11)                                                                       | 10.3 (6)                                                                            | 58.6%<br>(34)                                                                       |
| I could/would be able to understand my teacher while she/he was wearing a mask | 0%<br>(0)                                                                         | 5.3%<br>(3)                                                                       | 15.8%<br>(9)                                                                      | 22.8%<br>(13)                                                                       | 56.1%<br>(32)                                                                       |
| <b>Children in Grades 5 and Above</b>                                          |                                                                                   |                                                                                   |                                                                                   |                                                                                     |                                                                                     |
| <b>Item</b>                                                                    | <b>Responses</b>                                                                  |                                                                                   |                                                                                   |                                                                                     |                                                                                     |
|                                                                                | 1, Not at all                                                                     | 2, A little bit                                                                   | 3, A lot                                                                          |                                                                                     |                                                                                     |
| I am looking forward to returning to in-person school                          | 3.9%<br>(5)                                                                       | 42.2%<br>(54)                                                                     | 53.1%<br>(68)                                                                     |                                                                                     |                                                                                     |
| I am worried about getting COVID-19 at school                                  | 29.9%<br>(38)                                                                     | 60.6%<br>(77)                                                                     | 9.4%<br>(12)                                                                      |                                                                                     |                                                                                     |
|                                                                                | 3, Very hard                                                                      | 2, A little hard                                                                  | 1, No problem                                                                     |                                                                                     |                                                                                     |
| Wearing a mask all day was/would be:                                           | 29.1%<br>(37)                                                                     | 52%<br>(66)                                                                       | 18.9%<br>(24)                                                                     |                                                                                     |                                                                                     |
| Talking and playing with my classmates while                                   | 20.6%<br>(26)                                                                     | 57.9%<br>(73)                                                                     | 21.4%<br>(27)                                                                     |                                                                                     |                                                                                     |

|                                                                        |                   |                   |               |                      |                      |
|------------------------------------------------------------------------|-------------------|-------------------|---------------|----------------------|----------------------|
| wearing a mask was/would be:                                           |                   |                   |               |                      |                      |
| Understanding my teacher while she/he was wearing a mask was/would be: | 7.1%<br>(9)       |                   | 43.3%<br>(55) |                      | 49.6%<br>(63)        |
| Focusing on what I had to learn while wearing a mask was/would be:     | 15.7%<br>(20)     |                   | 48%<br>(61)   |                      | 36.2%<br>(46)        |
|                                                                        | 5, Strongly agree | 4, Agree somewhat | 3, Not sure   | 2, Somewhat disagree | 1, Strongly disagree |
| I would like to wear a mask at school                                  | 17.5%<br>(22)     | 29.4%<br>(37)     | 23.8%<br>(30) | 16.7%<br>(21)        | 12.7%<br>(16)        |
| Wearing a mask made/would make school less fun                         | 16.5%<br>(21)     | 34.6%<br>(44)     | 15.7%<br>(20) | 24.4%<br>(31)        | 8.7%<br>(11)         |
